# Supplementary material for: Integrated Green Process for the Extraction of Red Grape Pomace Antioxidant Polyphenols Using Ultrasound-Assisted Pretreatment and β-Cyclodextrin
Source: MDPI journal article supplement (doi:10.3390/beverages7030059), 2021-08-19
Supplement: s1 [file s1]

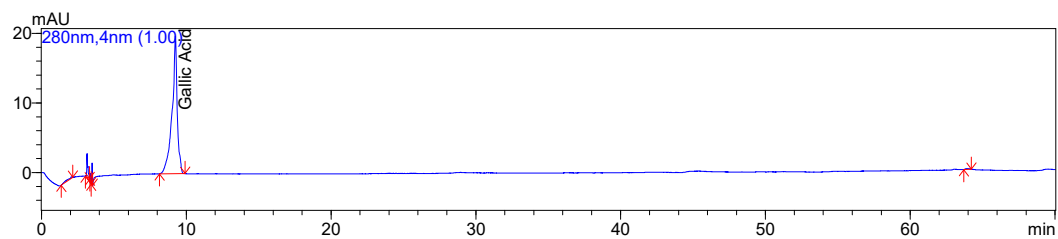

Figure S1: Gallic acid standard (10 mg L<sup>-1</sup>)

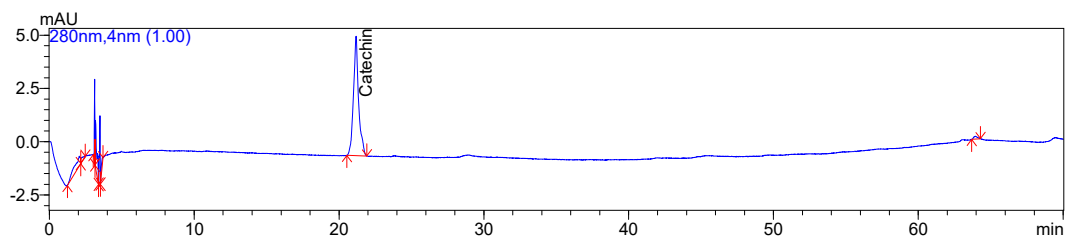

Figure S2: Catechin standard (10 mg L<sup>-1</sup>)

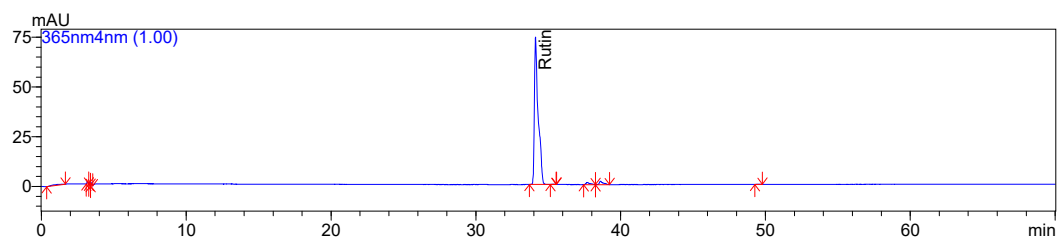

Figure S3: Rutin standard (10 mg L<sup>-1</sup>)

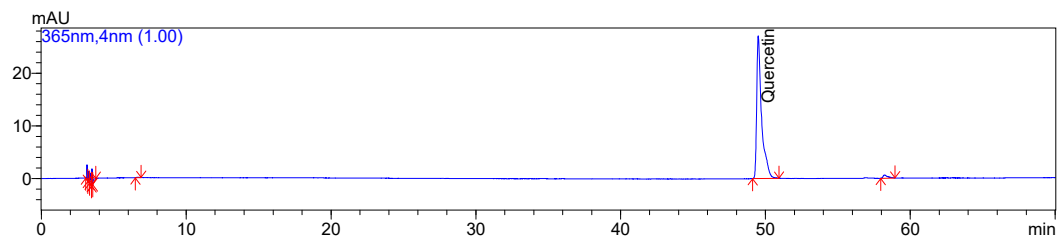

Figure S4: Quercetin standard (10 mg L<sup>-1</sup>)
